# Supplementary material for: An ultrathin memristor based on a two-dimensional WS2/MoS2 heterojunction
Source: Royal Society of Chemistry journal article supplement (doi:10.1039/d1nr01683k), 2021-01-01
Supplement: d1nr01683k1.pdf [file d1nr01683k1.pdf]

# Supporting Information

## Ultrathin memristor based on two-dimensional WS<sub>2</sub>/MoS<sub>2</sub> heterojunction

*Wenguang Zhang<sup>‡</sup>, Hui Gao<sup>‡</sup>, Chunsan Deng, Ting Lv, Sanlue Hu, Hao Wu, Songyan Xue,  
Yufeng Tao, Leimin Deng, Wei Xiong\**

Wuhan National Laboratory for Optoelectronics, School of Optical and Electronic Information,  
Huazhong University of Science and Technology, Wuhan 430074, China.

\*E-mail: [weixiong@hust.edu.cn](mailto:weixiong@hust.edu.cn)

### 1. Device fabrication

In this experiment, we use solid-state sulfurization to grow 2D material single layer and heterojunction. Molybdenum (purity: 99.99%) and tungsten (purity: 99.99%) sputtering target, and sulfur powder (purity: 99.9999%) are purchased from Sigma-Aldrich Chemical Company. All materials are used without further purification. First, we evenly coat the ultra-clean substrate with W and Mo metal atomic films at a rate of 5 Å s<sup>-1</sup> by magnetron sputtering (Beijing WSP3200). We put the reacted precursor sulfur powder and the metal-plated sample in the rapid annealing furnace (MTI OFT-1200X), as shown in Figure S1a. The whole heating process is divided into three steps: first, the temperature in the furnace is increased from room temperature to 120 °C, and the Ar/H<sub>2</sub> mixed gas is continuously introduced at a low speed; second, the temperature in the furnace is increased to the designated sulfurization temperature (from 550 to 850 °C) after 30 minutes, and the temperature is maintained for 15 minutes; finally, we continuously pass in high-purity Ar during the cooling process. We can summarize the entire 2D material growth process into two

steps in Figure S1b, including metal deposition on various substrates and vacuum sulfurization. The top electrode of the 2D material memristor was deposited by e-beam evaporation (ALPHA-PLUSCO.Ltd, Ebeam-500s) at the rate of  $2 \text{ \AA s}^{-1}$ .

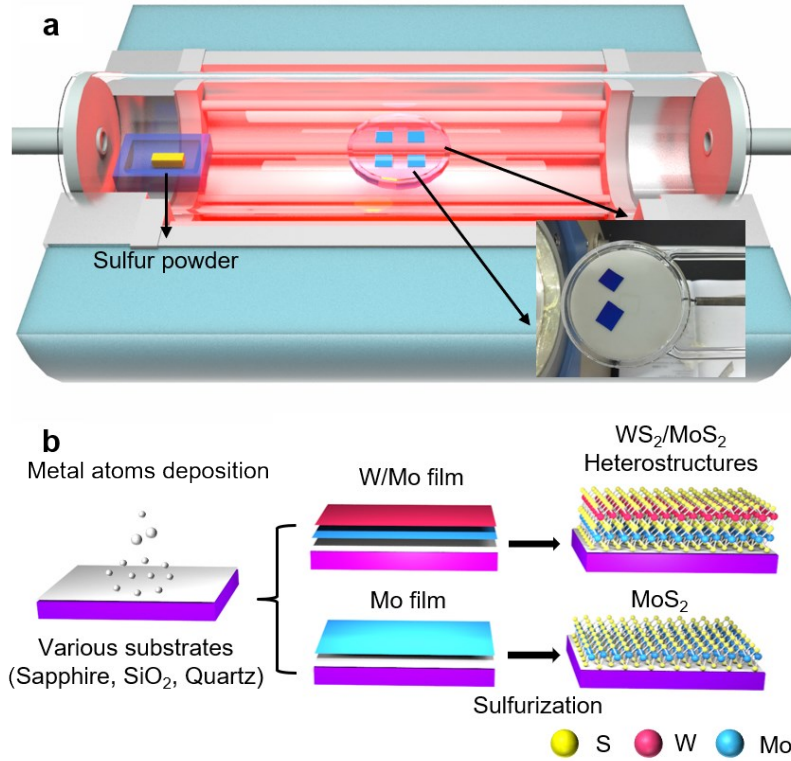

**Figure S1.** Diagrams of the synthesis of WS<sub>2</sub>/MoS<sub>2</sub> heterojunction. (a) Schematics of the sulfurization furnace. (b) Schematics of metal deposition and sulfurization processes of the 2D materials.

## 2. AFM, Optical, and SEM Characterization of 2D materials

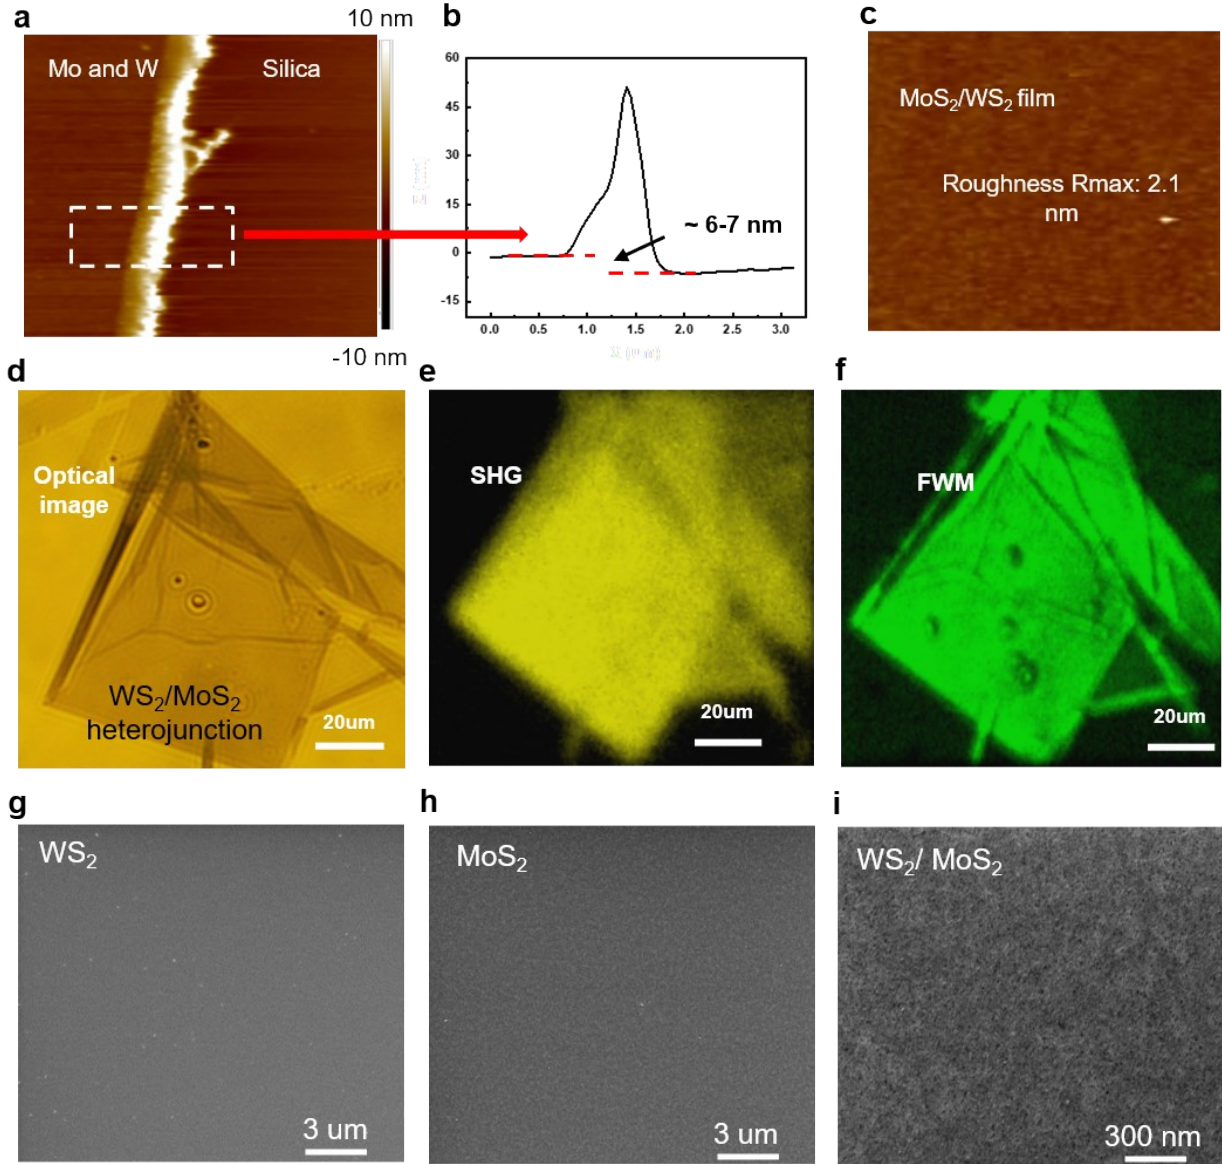

**Figure S2.** Characterization of the metal thin films of W and Mo before and after sulfurization. (a,b) AFM characterization results of the sample before sulfurization; (c) AFM characterization result shows that the maximum roughness of the thin film samples after sulfurization. (d) Optical image of the WS<sub>2</sub>/MoS<sub>2</sub> heterojunction. (e-f) SHG and FWM images of WS<sub>2</sub>/MoS<sub>2</sub> heterojunction. (g-i) Surface characterization of WS<sub>2</sub>, MoS<sub>2</sub> and WS<sub>2</sub>/MoS<sub>2</sub> heterojunction by SEM.

We perform HRTEM on the cross-section of the WS<sub>2</sub>/MoS<sub>2</sub> heterostructure. The materials grown on a silicon wafer were cut by focus ion beam (FIB, FEI Helios G3) and characterized by HRTEM (Tecnan G20). The obvious delamination of heterojunction can be seen from Figure S3 (a), the Pt on the heterojunction is used for protecting the 2D materials from FIB. The

heterogeneous interface can be clearly seen in the middle of the WS<sub>2</sub>/MoS<sub>2</sub> heterostructure. The thickness of the WS<sub>2</sub> and MoS<sub>2</sub> layers is about 5 nm and 7 nm, respectively.

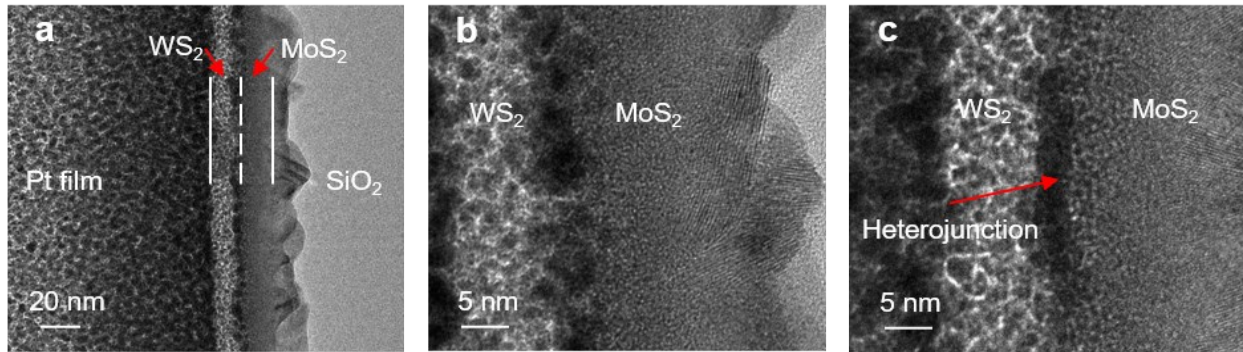

Figure S3 HRTEM images of the cross-section of WS<sub>2</sub>/MoS<sub>2</sub> heterostructure growth on a Si/SiO<sub>2</sub> substrate. (a-c) Obvious layered WS<sub>2</sub>/MoS<sub>2</sub> heterostructure, the Pt is coated to protect the 2D material from the FIB.

The WS<sub>2</sub>/MoS<sub>2</sub> heterojunction was characterized by Raman spectroscopy with 514.5 nm laser (Renishaw InVia Raman microscope). Surface morphologies of heterojunction were characterized by field-emission scanning electron microscopy (Nova NanoSEM 450, 10kV). The thickness was detected by an atomic force microscope (Veeco NanoScope MultiMode).

### 3. Typical I-V characteristics of the MoS<sub>2</sub> and WS<sub>2</sub> memristors

Figure S3a shows the schematic illustration of the MoS<sub>2</sub> thin film memristor. Synthetic MoS<sub>2</sub> layers on ITO substrate were fabricated using the same sulfurization method as growing WS<sub>2</sub>/MoS<sub>2</sub> heterojunction. DC electrical measurements were performed on this device. As shown in Figure S3b, we can obtain a typical memristive switching cycle (State I). But after several switching cycles, the resistance state of the MoS<sub>2</sub> memristor always stays unalterably LRS (State II). Figure S3c shows the schematic diagram to explain the failure mechanism of the MoS<sub>2</sub> thin film memristor based on the MIM structure. After several cycles of resistance switching (State I), the sulfur ions penetrated the entire MoS<sub>2</sub> thin film to form the conducting filaments which are difficult to restore back to the original HRS state due to the inevitable lattice damage of the MoS<sub>2</sub> film. Therefore, the MoS<sub>2</sub> device is in a long-term LRS (State II). All the *I-V* characterizations are performed by using an Agilent Kesight B1500A semiconductor parameter analyzer with a Cascade probe station at room temperature.

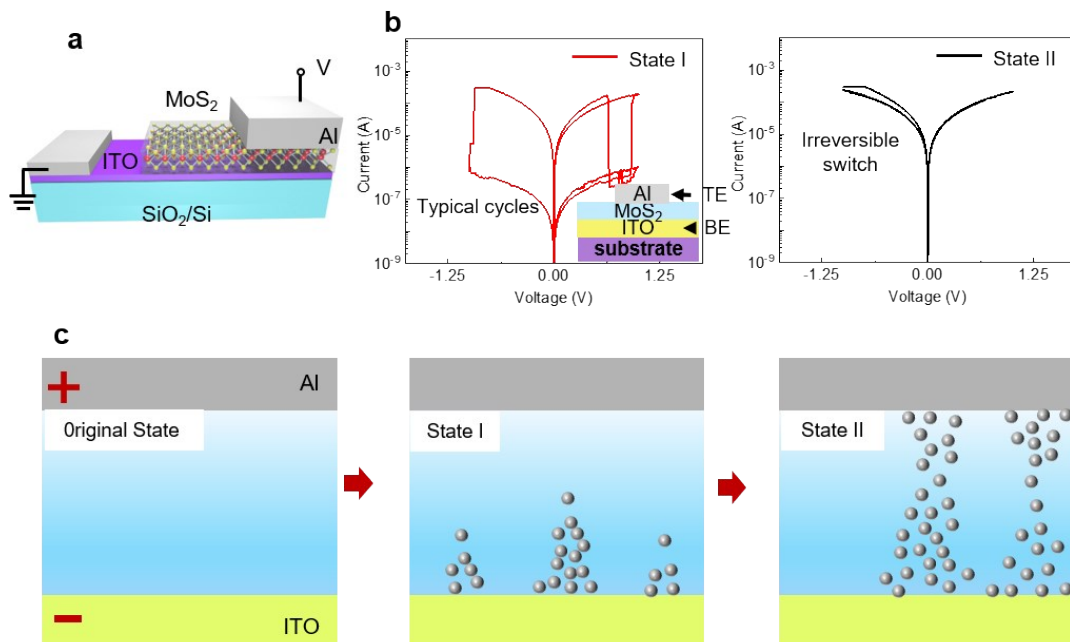

**Figure S4.** Typical  $I$ - $V$  curves of the as-fabricated MoS<sub>2</sub> memristor. (a) Schematic diagram of the device structure of MoS<sub>2</sub> memristor. (b) Typical resistance switching curves of the MoS<sub>2</sub> memristor with respect to the applied voltage at the initial state (State I) and breakdown state (State II). (c) Schematic diagram of the failure mechanism of the conventional MIM MoS<sub>2</sub> memristor.

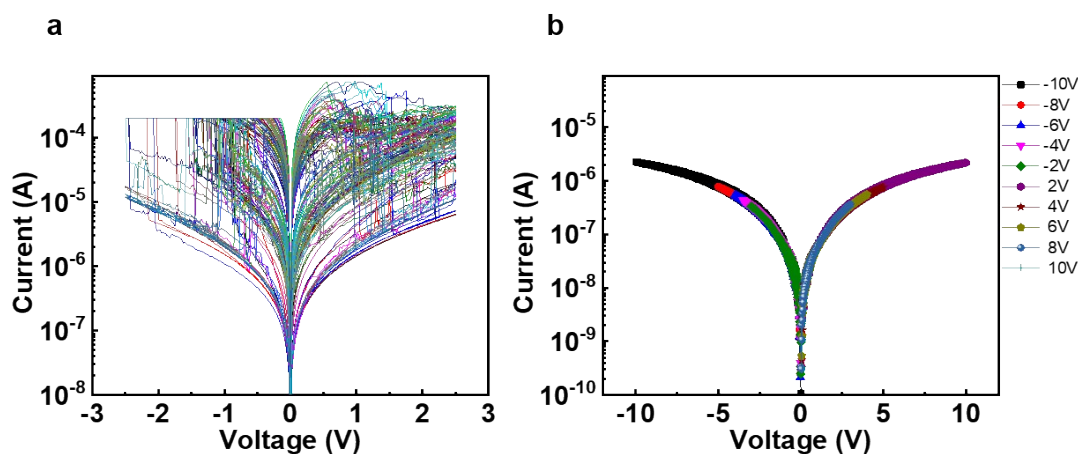

**Figure S5.** (a) Typical  $I$ - $V$  switching curves of the Al/MoS<sub>2</sub>/ITO memristor; (b) Typical  $I$ - $V$  switching curves of the Al/WS<sub>2</sub>/ITO memristor.

We have added one set of area-scaling experiments in the Supporting Information (Figure S6). The 2D material memristors with larger top electrodes are fabricated in the same way in

the control experiment. The inset of Figure S6 shows the schematic diagram of the devices. The resistance has a relatively uniform conductivity as revealed by the independent I-V characterization, which scales down a memristor cell with a resistance  $R_0$  and area  $A_0$  ( $100 \mu\text{m} \times 100 \mu\text{m}$ ), presenting in either low resistance state (LRS) or high resistance state (HRS). Moreover, the device with a larger electrode is demonstrated with their respective resistance  $R$  and area  $A$  ( $200 \mu\text{m} \times 200 \mu\text{m}$ ). For both states, a linear relationship  $RA=a R_0A_0$  is obeyed by the chosen part. As shown in Figure S6, the value of the constant-coefficient  $a$  is close to 1, so the resistance of conducting layer is uniform under the applied voltages [Nanoscale, 8, 18113, (2016)]. This indicated a non-filamentary memristive mechanism, because if the filaments are formed in the localized spot, the resistance of the larger area could remain highly divergent to that of the surrounding function layer, then presenting orders of magnitude more resistive [Nature Electronics, 2, 66, (2019)].

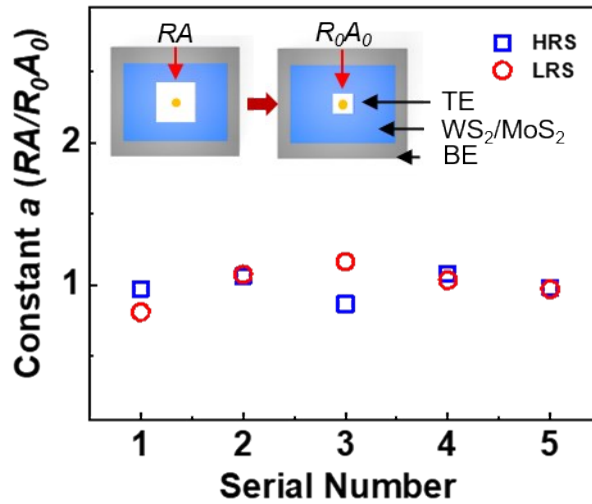

Figure S6. Area-dependent resistance measurement of featured heterojunction memristors: Range of constant  $a$  in the equation  $RA=a R_0A_0$ . Inset: schematic of the tested devices.

#### 4. Influence of the sulfur ion distribution on the band structure and electrical conductivity of the $\text{WS}_2/\text{MoS}_2$ heterojunction

In order to study the influence of sulfur ion on the band structure and electric conductivity of  $\text{WS}_2/\text{MoS}_2$  heterojunction, the thermionic emission theory was employed to figure out the relationship between the current flow across the heterojunction and the sulfur ions distribution.

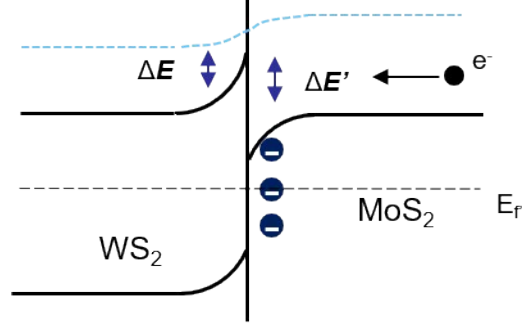

**Figure S7:** Band structure of the WS<sub>2</sub>/MoS<sub>2</sub> heterojunction

According to Poisson's equation, the impurity concentration and potential relationship can be obtained as:

$$\frac{\exp\left(\frac{q}{k_B T}\phi_1\right) - \frac{q}{k_B T}\phi_1 - 1}{\exp\left(-\frac{q}{k_B T}\phi_2\right) + \frac{q}{k_B T}\phi_2 - 1} = \frac{\varepsilon_2 N_2}{\varepsilon_1 N_1} \quad (1)$$

where  $\phi_1$  and  $\phi_2$  are the barrier height of WS<sub>2</sub> and MoS<sub>2</sub> respectively.  $N_1$  and  $N_2$  are the net excess density near the contact,  $\varepsilon_1$  and  $\varepsilon_2$  are the dielectric constants of WS<sub>2</sub> and MoS<sub>2</sub>. and  $k_B$  is the Boltzmann constant. According to the thermal electron emission model, the formation of electron current is realized by diffusion motion. The effective electrons striking the wall of the barrier in a unit of time are only a part. The transmission coefficient  $X$  from Anderson's rules is applied to consider the electron reflection at the MoS<sub>2</sub>/WS<sub>2</sub> interface. We assume the voltages applied on WS<sub>2</sub> and MoS<sub>2</sub> are  $V_1$  and  $V_2$ , respectively. Then, we can obtain the equation of current density across the MoS<sub>2</sub>/WS<sub>2</sub> heterojunction as follows:

$$J = XeN_2 \sqrt{\frac{k_B T}{2\pi m}} \exp\left(-\frac{\phi_2}{k_B T}\right) \times \left[ \exp\left(\frac{eV_2}{k_B T}\right) - \exp\left(-\frac{eV_1}{k_B T}\right) \right] \quad (2)$$

where  $T$  is the temperature respectively.  $J$  is the thermionic emission current caused by the thermal motion of electrons. When  $V$  is a positive number, the second item in parentheses can be ignored. Then the equation (2) can be simplified to:

$$J = XeN_2 \sqrt{\frac{k_B T}{2\pi m}} \exp\left(-\frac{\phi_2}{k_B T}\right) \times \left[ \exp\left(\frac{eV_2}{k_B T}\right) \right] \quad (3)$$

It is noted that there is also the presence of tunneling current in the heterojunction. Band structure variation with the change of electric field during the SET and RESET processes can be clearly reflected in Fig. 5(b).

According to the above equation, we can see that when the external voltage is increased, the partial pressure on both sides of the heterojunction is basically unchanged. As the voltage reaches the electric migration threshold of the sulfur ions, the sulfur ions rapidly aggregate at the MoS<sub>2</sub>/WS<sub>2</sub> interface region on the MoS<sub>2</sub> side, causing a sudden increase in the effective impurity concentration. At the same time, the localized aggregation of sulfur ions causes an increase in tunneling probability, and hence the tunneling current is abruptly increased. Therefore, the current across the MoS<sub>2</sub>/WS<sub>2</sub> heterojunction jumps at the SET process. Similarly, when a reverse voltage is applied, as the voltage reaches the migration threshold, and the sulfur ions are removed from the heterojunction region, thereby resulting in the decrease of the device current at the RESET process.

## REFERENCES

1. Kresse, G.; Furthmüller, J., Efficient iterative schemes for ab initio total-energy calculations using a plane-wave basis set. *Phys. Rev. B.* **1996**, 54(16), 11169-11186.
2. Perdew, J. P.; Burke, K.; Ernzerhof, M., Generalized Gradient Approximation Made Simple. *Phys. Rev. Lett.* **1996**, 77(18), 3865-3868
3. Grimme S, Antony J, Ehrlich S, et al. A consistent and accurate ab initio parametrization of density functional dispersion correction (DFT-D) for the 94 elements H-Pu. *The Journal of chemical physics*, **2010**, 132(15): 154104.
